# Supplementary material
Source: MDPI journal article supplement (https://www.mdpi.com/2072-4292/15/8/2168)
Supplement: s1 [file s1 › remotesensing-2289723-supplementary.pdf]

## Supplementary material

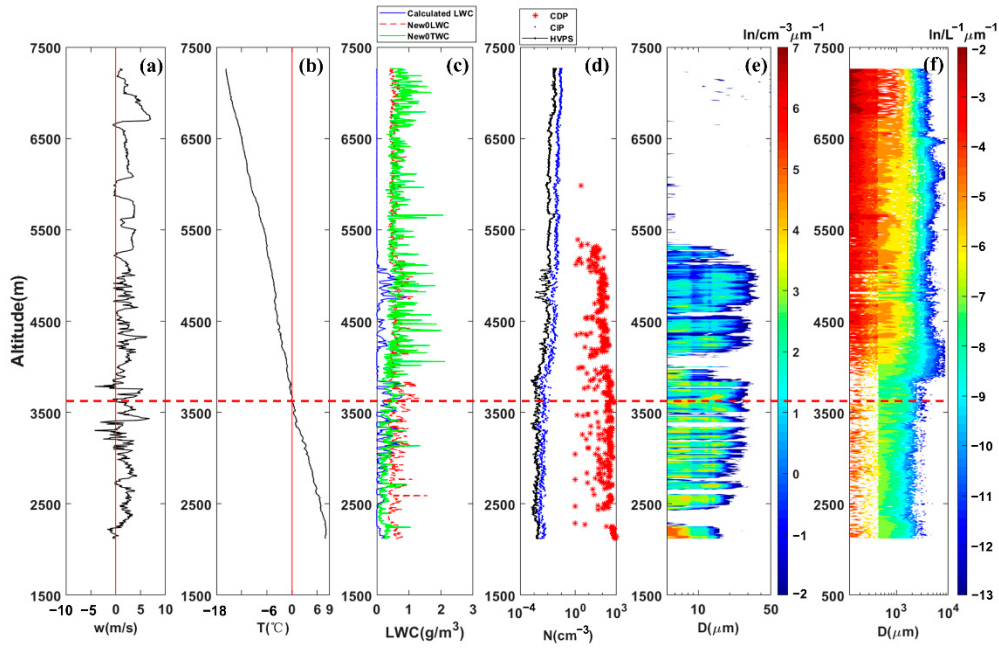

**Figure S1.** The aircraft observation data set of V2 on 22 May 2017 in the convective cell, (a) vertical velocity (the red line is 0, units:  $\text{m s}^{-1}$ ,  $^{\circ}\text{C}$ ); (b) temperature (units:  $^{\circ}\text{C}$ , the red line is 0); (c) calculated liquid water content (calculated LWC), probe detected liquid water content (New0LWC), probe detected total water content (New0TWC) (units:  $\text{g m}^{-3}$ ); (d) particle number concentration of the CDP, the CIP, and the HVPS (units:  $\text{cm}^{-3}$ ); (e) particle spectrum of CDP (units:  $\text{cm}^{-3}\mu\text{m}^{-1}$ ); (f) particle spectrum of the CIP (100–400  $\mu\text{m}$ ) and the HVPS (400–8700  $\mu\text{m}$ ) (units:  $\text{L}^{-1}\mu\text{m}^{-1}$ ). The red dotted line is the 0  $^{\circ}\text{C}$  layer.

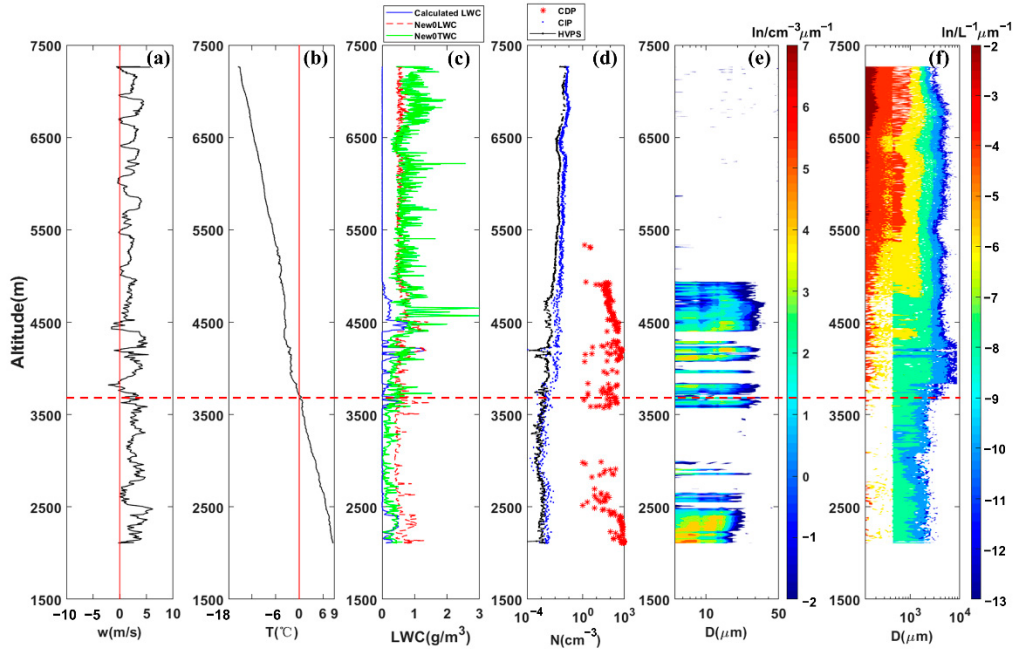

**Figure S2.** The aircraft observation data set of V3 on 22 May 2017 in the convective cell, (a) vertical velocity (the red line is 0, units:  $\text{m s}^{-1}$ ,  $^{\circ}\text{C}$ ); (b) temperature (units:  $^{\circ}\text{C}$ , the red line is 0);

(c) calculated liquid water content (calculated LWC), probe detected liquid water content (New0LWC), probe detected total water content (New0TWC) (units:  $\text{g m}^{-3}$ ); (d) particle number concentration of the CDP, the CIP, and the HVPS (units:  $\text{cm}^{-3}$ ); (e) particle spectrum of CDP (units:  $\text{cm}^{-3}\mu\text{m}^{-1}$ ); (f) particle spectrum of the CIP (100–400  $\mu\text{m}$ ) and the HVPS (400–8700  $\mu\text{m}$ ) (units:  $\text{L}^{-1}\mu\text{m}^{-1}$ ). The red dotted line is the 0  $^{\circ}\text{C}$  layer.

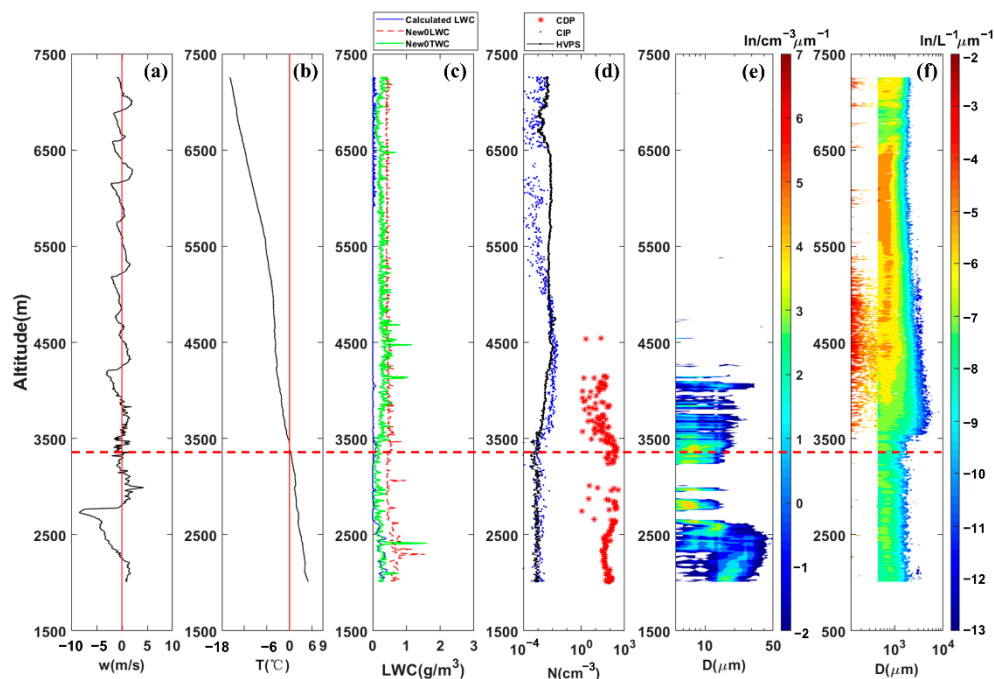

**Figure S3.** The aircraft observation data set of V5 on 22 May 2017 in the stratiform cloud area, (a) vertical velocity (the red line is 0, units:  $\text{m s}^{-1}$ ,  $^{\circ}\text{C}$ ); (b) temperature (units:  $^{\circ}\text{C}$ , the red line is 0); (c) calculated liquid water content (calculated LWC), probe detected liquid water content (New0LWC), probe detected total water content (New0TWC) (units:  $\text{g m}^{-3}$ ); (d) particle number concentration of the CDP, the CIP, and the HVPS (units:  $\text{cm}^{-3}$ ); (e) particle spectrum of CDP (units:  $\text{cm}^{-3}\mu\text{m}^{-1}$ ); (f) particle spectrum of the CIP (100–400  $\mu\text{m}$ ) and the HVPS (400–8700  $\mu\text{m}$ ) (units:  $\text{L}^{-1}\mu\text{m}^{-1}$ ). The red dotted line is the 0  $^{\circ}\text{C}$  layer.

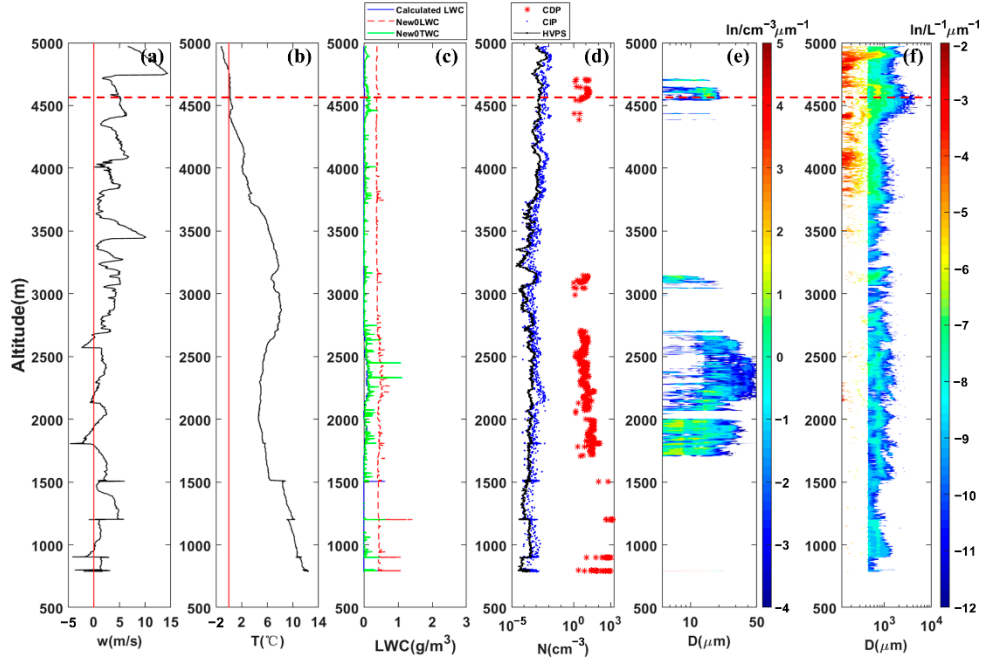

**Figure S4.** The aircraft observation data set of V1 on 21 May 2018 in the convective cell, (a) vertical velocity (the red line is 0, units:  $\text{m s}^{-1}$ ,  $^{\circ}\text{C}$ ); (b) temperature (units:  $^{\circ}\text{C}$ , the red line is 0); (c) calculated liquid water content (calculated LWC), probe detected liquid water content (New0LWC), probe detected total water content (New0TWC) (units:  $\text{g m}^{-3}$ ); (d) particle number concentration of the CDP, the CIP, and the HVPS (units:  $\text{cm}^{-3}$ ); (e) particle spectrum of CDP (units:  $\text{cm}^{-3}\mu\text{m}^{-1}$ ); (f) particle spectrum of the CIP (100–400  $\mu\text{m}$ ) and the HVPS (400–8700  $\mu\text{m}$ ) (units:  $\text{L}^{-1}\mu\text{m}^{-1}$ ). The red dotted line is the 0  $^{\circ}\text{C}$  layer.

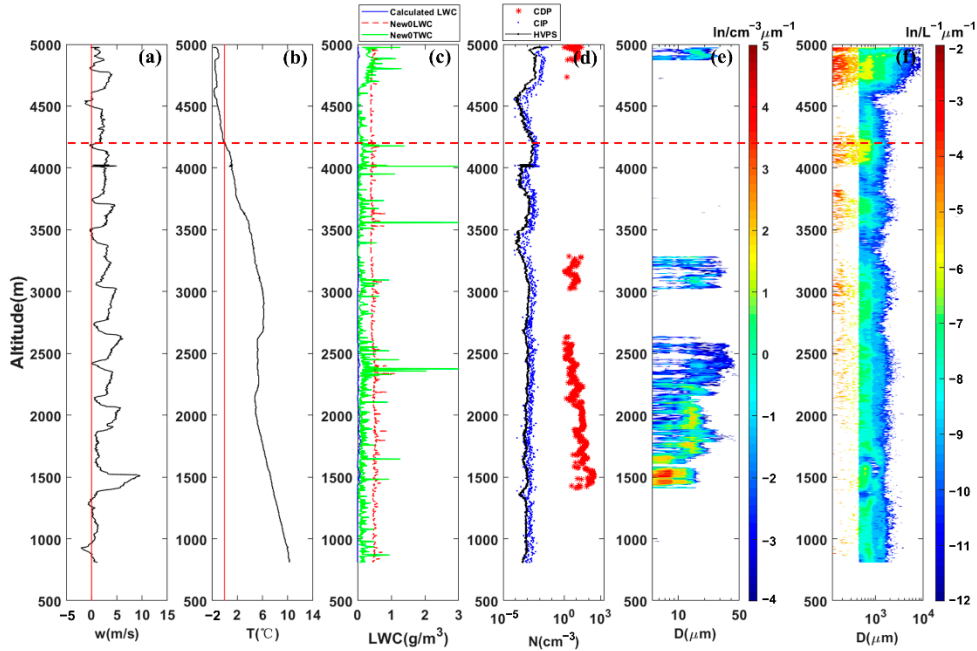

**Figure S5.** The aircraft observation data set of V2 on 21 May 2018 in the stratiform cloud area, (a) vertical velocity (the red line is 0, units:  $\text{m s}^{-1}$ ,  $^{\circ}\text{C}$ ); (b) temperature (units:  $^{\circ}\text{C}$ , the red line is 0); (c) calculated liquid water content (calculated LWC), probe detected liquid water content

(New0LWC), probe detected total water content (New0TWC) (units:  $\text{g m}^{-3}$ ); (d) particle number concentration of the CDP, the CIP, and the HVPS (units:  $\text{cm}^{-3}$ ); (e) particle spectrum of CDP (units:  $\text{cm}^{-3}\mu\text{m}^{-1}$ ); (f) particle spectrum of the CIP (100–400  $\mu\text{m}$ ) and the HVPS (400–8700  $\mu\text{m}$ ) (units:  $\text{L}^{-1}\mu\text{m}^{-1}$ ). The red dotted line is the 0  $^{\circ}\text{C}$  layer.

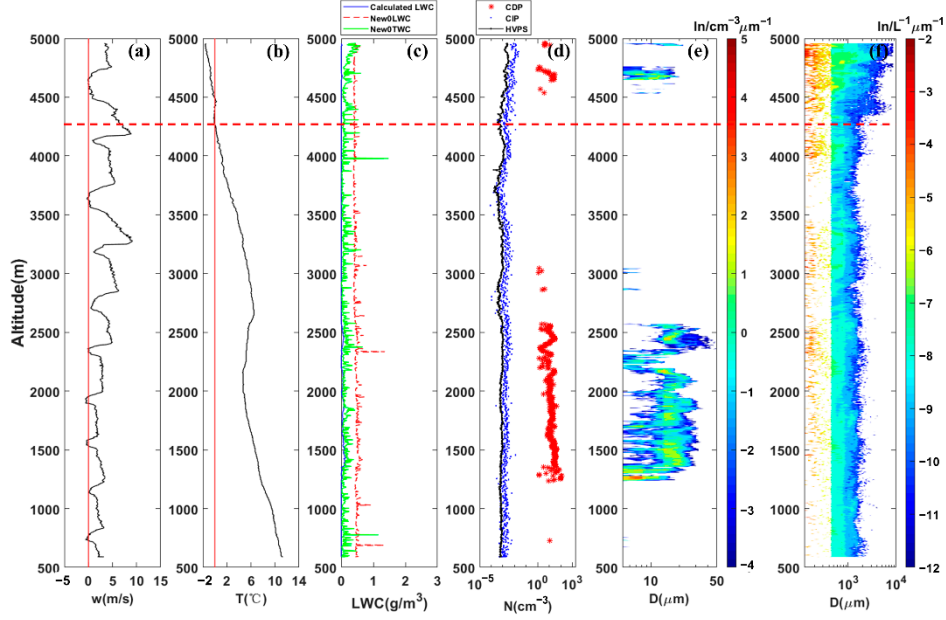

**Figure S6.** The aircraft observation data set of V3 on 21 May 2018 in the stratiform cloud area, (a) vertical velocity (the red line is 0, units:  $\text{m s}^{-1}$ ,  $^{\circ}\text{C}$ ); (b) temperature (units:  $^{\circ}\text{C}$ , the red line is 0); (c) calculated liquid water content (calculated LWC), probe detected liquid water content (New0LWC), probe detected total water content (New0TWC) (units:  $\text{g m}^{-3}$ ); (d) particle number concentration of the CDP, the CIP, and the HVPS (units:  $\text{cm}^{-3}$ ); (e) particle spectrum of CDP (units:  $\text{cm}^{-3}\mu\text{m}^{-1}$ ); (f) particle spectrum of the CIP (100–400  $\mu\text{m}$ ) and the HVPS (400–8700  $\mu\text{m}$ ) (units:  $\text{L}^{-1}\mu\text{m}^{-1}$ ). The red dotted line is the 0  $^{\circ}\text{C}$  layer.

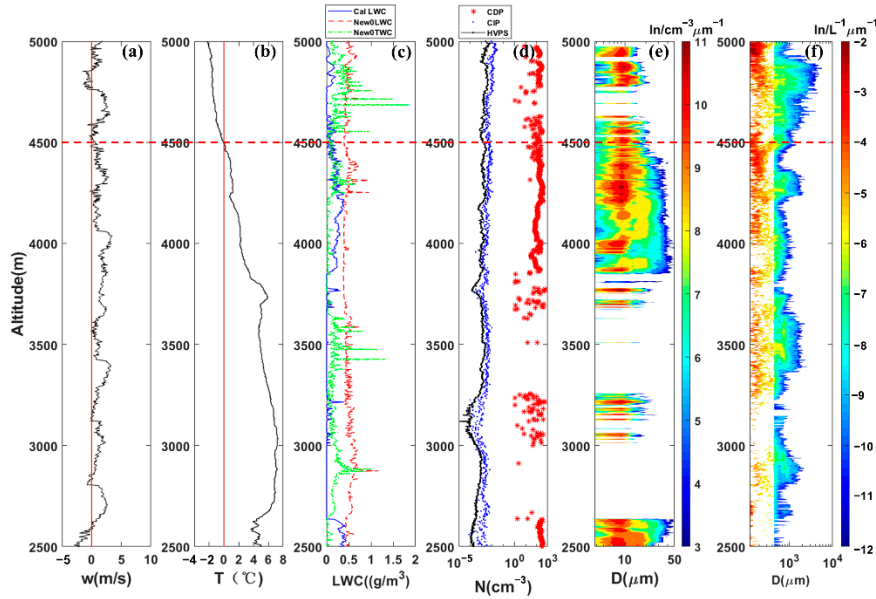

**Figure S7.** The aircraft observation data set of V4 on 24 August 2019 in the stratiform cloud area, (a) vertical velocity (the red line is 0, units:  $\text{m s}^{-1}$ ,  $^{\circ}\text{C}$ ); (b) temperature (units:  $^{\circ}\text{C}$ , the red line is 0); (c) calculated liquid water content (calculated LWC), probe detected liquid water content (New0LWC), probe detected total water content (New0TWC) (units:  $\text{g m}^{-3}$ ); (d) particle number concentration of the CDP, the CIP, and the HVPS (units:  $\text{cm}^{-3}$ ); (e) particle spectrum of CDP (units:  $\text{cm}^{-3}\mu\text{m}^{-1}$ ); (f) particle spectrum of the CIP (100–400  $\mu\text{m}$ ) and the HVPS (400–8700  $\mu\text{m}$ ) (units:  $\text{L}^{-1}\mu\text{m}^{-1}$ ). The red dotted line is the 0  $^{\circ}\text{C}$  layer.

0); (c) calculated liquid water content (calculated LWC), probe detected liquid water content (New0LWC), probe detected total water content (New0TWC) (units:  $\text{g m}^{-3}$ ); (d) particle number concentration of the CDP, the CIP, and the HVPS (units:  $\text{cm}^{-3}$ ); (e) particle spectrum of CDP (units:  $\text{cm}^{-3}\mu\text{m}^{-1}$ ); (f) particle spectrum of the CIP (100–400  $\mu\text{m}$ ) and the HVPS (400–8700  $\mu\text{m}$ ) (units:  $\text{L}^{-1}\mu\text{m}^{-1}$ ). The red dotted line is the 0 °C layer.

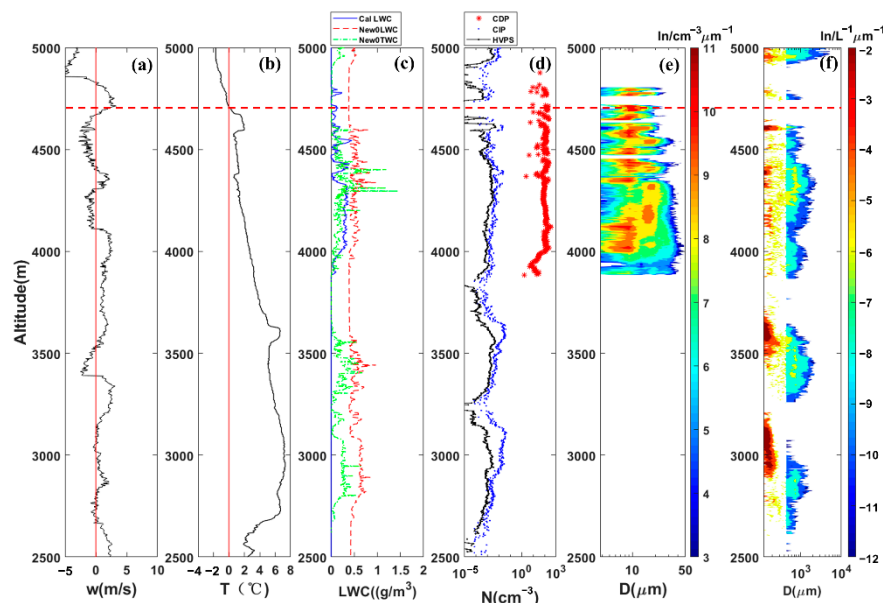

**Figure S8.** The aircraft observation data set of V8 on 24 August 2019 in the stratiform cloud area, (a) vertical velocity (the red line is 0, units:  $\text{m s}^{-1}$ , °C); (b) temperature (units: °C, the red line is 0); (c) calculated liquid water content (calculated LWC), probe detected liquid water content (New0LWC), probe detected total water content (New0TWC) (units:  $\text{g m}^{-3}$ ); (d) particle number concentration of the CDP, the CIP, and the HVPS (units:  $\text{cm}^{-3}$ ); (e) particle spectrum of CDP (units:  $\text{cm}^{-3}\mu\text{m}^{-1}$ ); (f) particle spectrum of the CIP (100–400  $\mu\text{m}$ ) and the HVPS (400–8700  $\mu\text{m}$ ) (units:  $\text{L}^{-1}\mu\text{m}^{-1}$ ). The red dotted line is the 0 °C layer.
